# Supplementary material for: Shape-controlled synthesis of PbS nanostructures from −20 to 240 °C: the competitive process between growth kinetics and thermodynamics
Source: Royal Society of Chemistry journal article supplement (doi:10.1039/c3ce40337h), 2013-01-01
Supplement: c3ce40337h.pdf [file c3ce40337h.pdf]

## Supplementary Information

### Shape-controlled synthesis of PbS nanostructures from -20 to 240 °C: the competitive process between growth kinetics and thermodynamics

Yingnan Wang, Xinyi Yang, Guanjin Xiao, Bo Zhou, Bingbing Liu, Guangtian Zou,  
and Bo Zou\*

*State Key Laboratory of Superhard Materials, Jilin University, Changchun 130012,  
China*

\* Corresponding authors. E-mails: zoubo@jlu.edu.cn

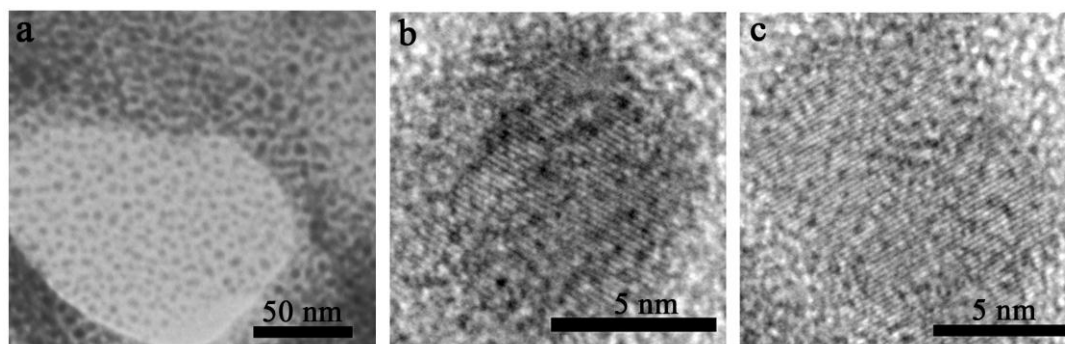

**Fig. S1** TEM (a) and HRTEM (b, c) images of PbS NCs synthesized at -20 °C with OLA and OA included.

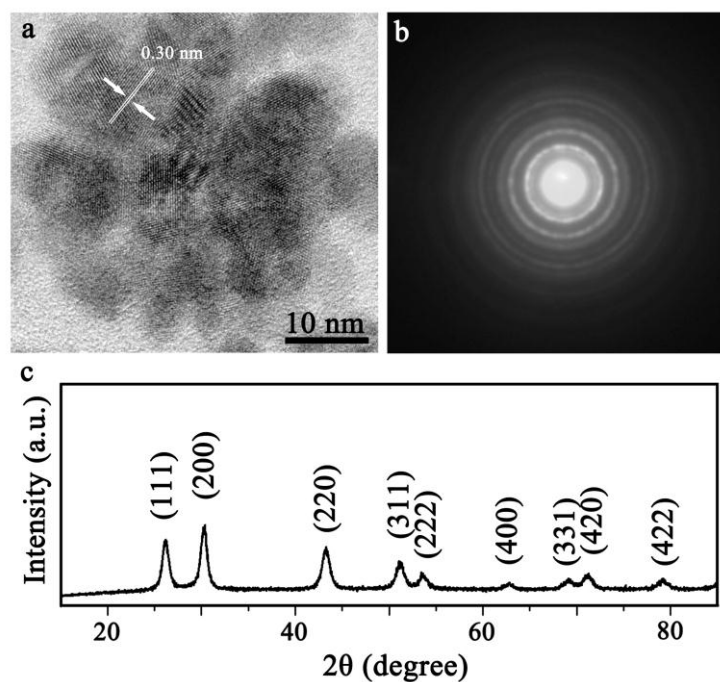

**Fig. S2** PbS nanoflowers synthesized at room temperature with OLA and OA included. (a) HRTEM image, (b) SAED pattern, and (c) XRD pattern of PbS nanoflowers.

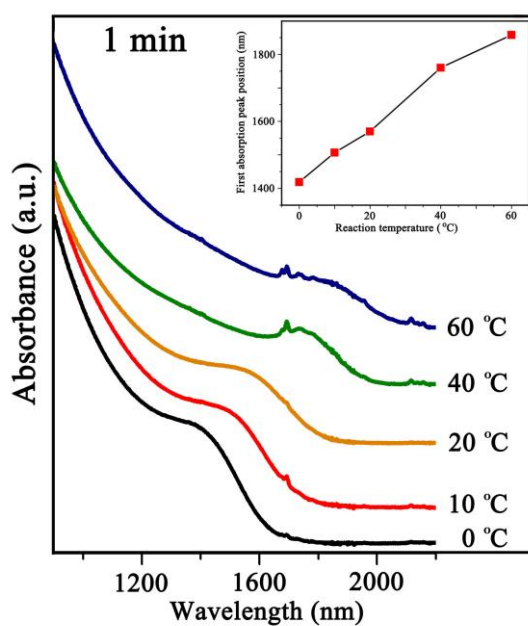

**Fig. S3** Near-infrared absorption spectra of PbS nanoparticles synthesized at different temperature. These PbS nanoparticles were synthesized with OLA included, and all these reactions were kept for 1 min. Inset in Fig. S3 is corresponding reaction temperature versus the position of the first absorption peak.

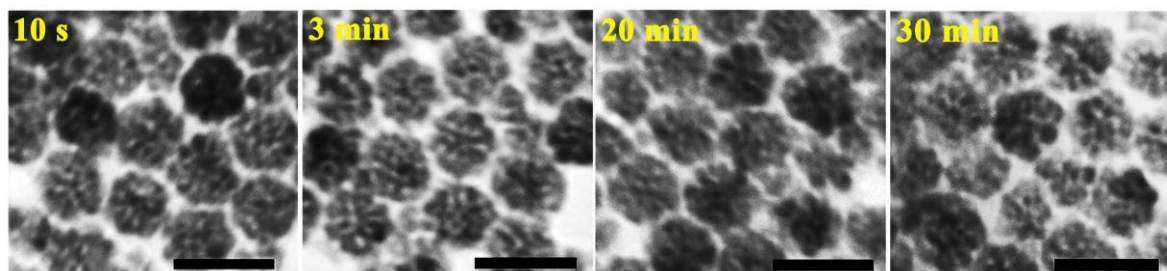

**Fig. S4** Temporal evolution of TEM images of the PbS nanoflowers synthesized at 25 °C with OA and OLA included. All scale bars represent 50 nm.

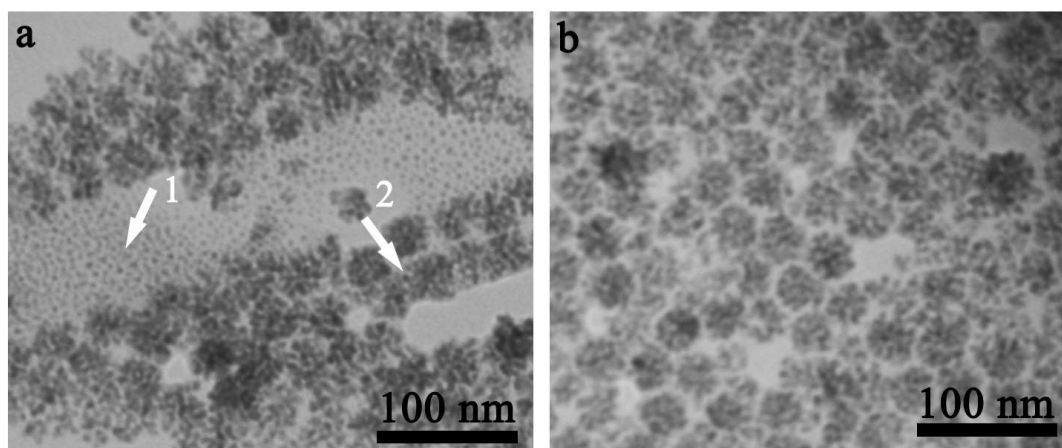

**Fig. S5** PbS nanoflowers synthesized at -10 °C (a) and 0 °C(b) with OLA and OA included. The arrows in panel a show the coexisting nanoparticles (arrow 1) and nanoflowers (arrow 2), respectively, indicating a transformation process from nanoparticles to nanoflowers.

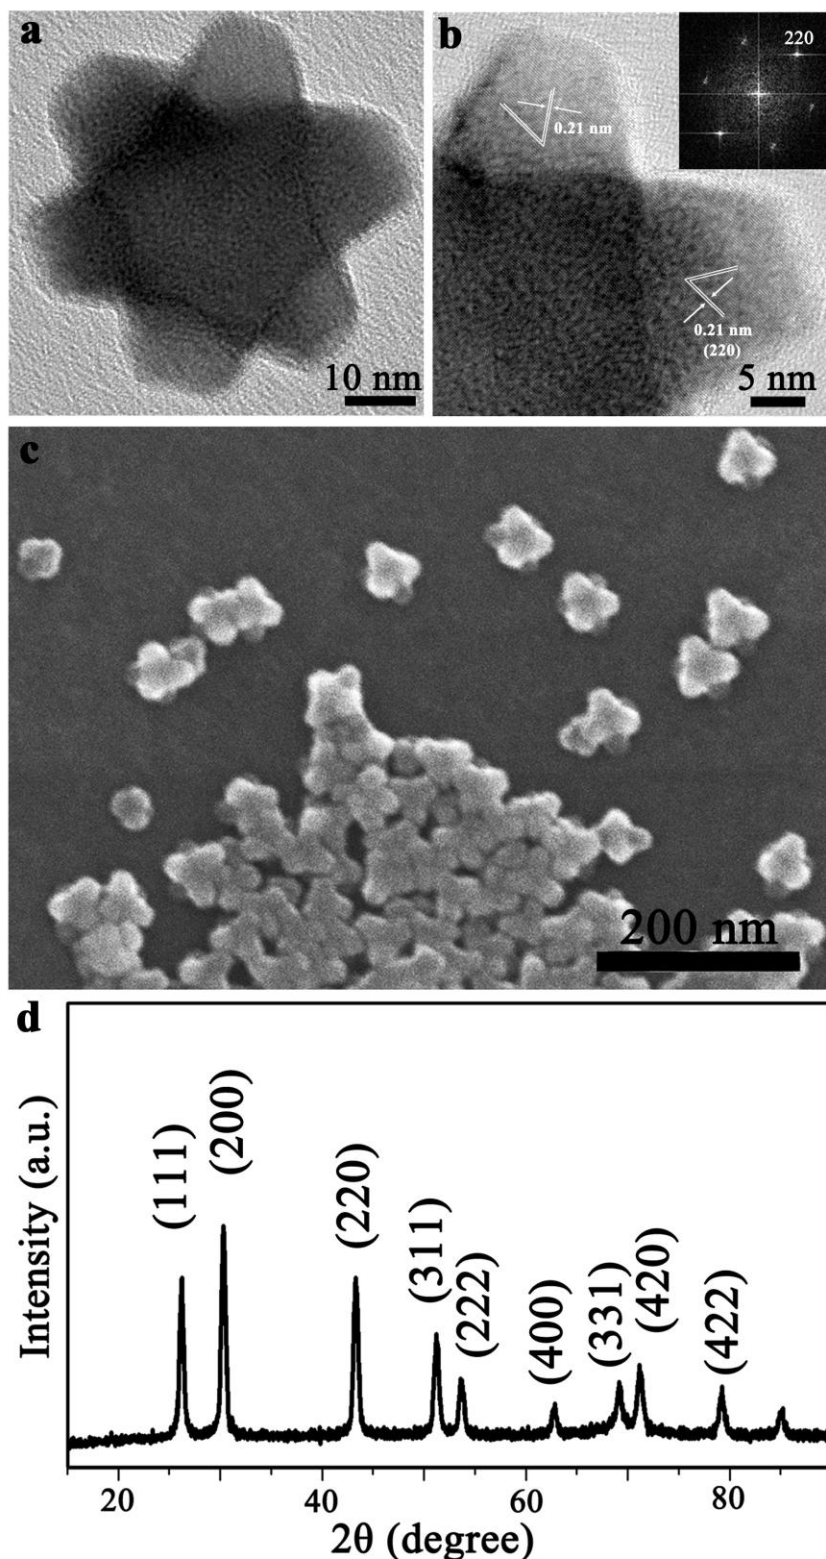

**Fig. S6** (a, b) HRTEM images of typical star-shaped PbS NCs synthesized by using individual alkylamine (OLA). (c) SEM image of star-shaped PbS NCs. (d) Corresponding XRD pattern of related PbS nanostars.



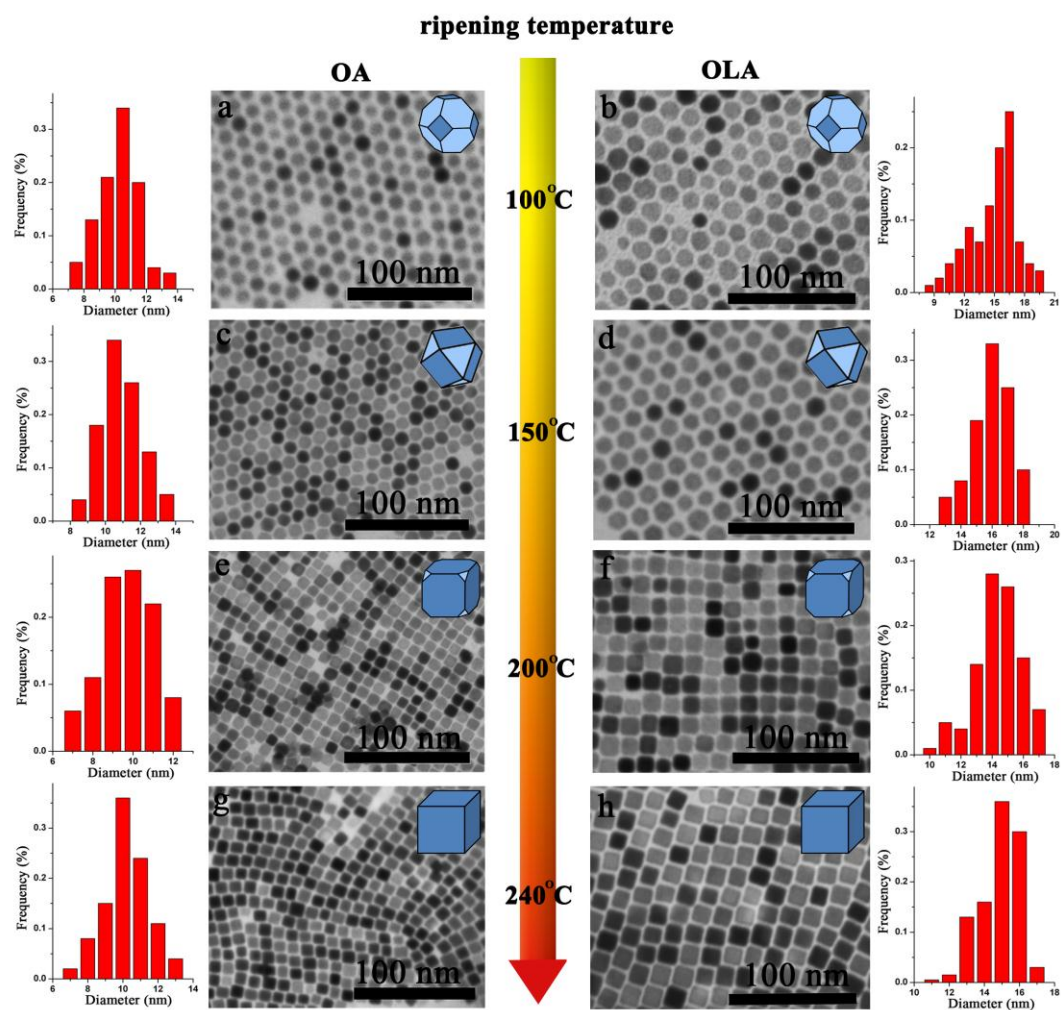

**Fig. S7** TEM images of PbS NCs ripened at different temperature by using OA (left column) and OLA (right column). (a, b) 100 °C; (c, d) 150 °C; (e, f) 200 °C; (g, h) 240 °C. (i) Schematic illustration of shape evolution process of PbS NCs depending on temperature.

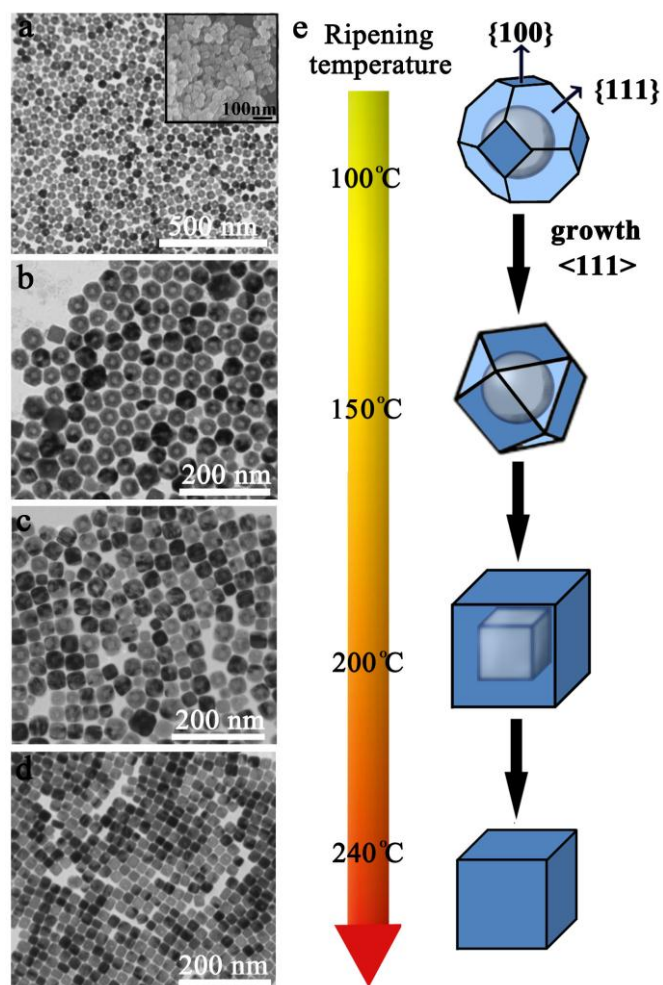

**Fig. S8** TEM images of the different-shaped PbS nanostructures evolved from nanoflowers at different ripening temperature. (a) spherical hollow nanostructures obtained at 100 °C, inset in Fig. a is the corresponding SEM image; (b) cuboctahedral hollow nanostructures obtained at 150 °C; (c) cubic-like hollow nanostructures obtained at 200 °C; (d) solid PbS nanocubes obtained at 240 °C. (e) Schematic illustration of shape evolution process of PbS nanoflowers depending on temperature.

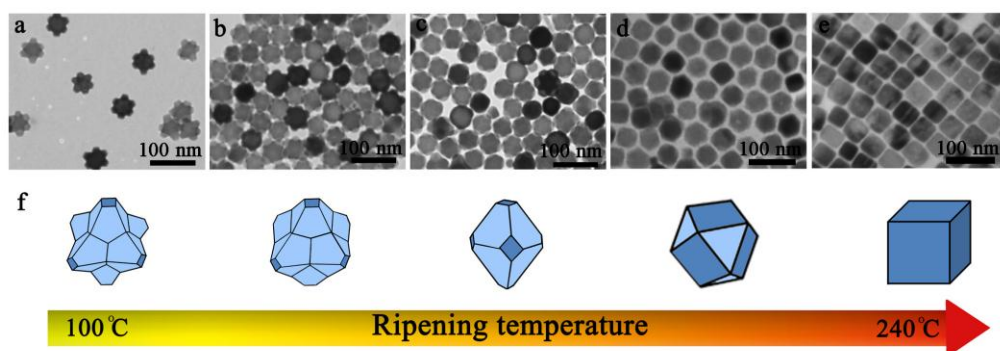

**Fig. S9** TEM images of the different-shaped PbS nanostructures evolved from nanostars at different ripening temperature. (a) star-shaped PbS NCs; (b) rounded PbS nanostars; (c) truncated octahedrons; (d) cuboctahedral PbS NCs; (e) cubic-like PbS NCs. (f) Schematic illustration of shape evolution process of PbS nanostars depending on temperature.
